# Supplementary material
Source: PubMed Central journal article supplement (PMC3888643)
Supplement: NIHMS536213-supplement-01.pdf [file NIHMS536213-supplement-01.pdf]

**Table S1. Analytical Equilibrium Ultracentrifugation Statistics, Related to Figure 1**

| Sample                   | ImI3    |               | ImI3-<br>ChI4 <sup>361-458</sup> | ImI3-<br>ChI4 <sup>full-length</sup> |
|--------------------------|---------|---------------|----------------------------------|--------------------------------------|
| Model                    | monomer | monomer:dimer | monomer                          | monomer                              |
| MW <sub>obs</sub> (kDa)  | 41251   | 27000         | 39317                            | 80896                                |
| MW <sub>calc</sub> (kDa) | 28066   |               | 38804                            | 80720                                |
| chisq                    | 16.2    | 12            | 12.5                             | 13.8                                 |
| locrmsd                  | .020    | .099          | .019                             | .019                                 |

**Table S2. Crystallographic Statistics, Related to Figure 2**

| Data Collection                       | Iml3 <sup>full-length</sup> | Iml3 <sup>full-length</sup> _<br>Chl4 <sup>361-458</sup> |
|---------------------------------------|-----------------------------|----------------------------------------------------------|
| Resolution (Å)                        | 38 – 2.5                    | 36 – 2.3                                                 |
| Wavelength (Å)                        | 0.97919                     | 0.97919                                                  |
| Space Group                           | P6 <sub>3</sub> 22          | I222                                                     |
| Unit Cell Dimensions (a, b, c)<br>(Å) | 73.14, 73.14, 189.13        | 38.48, 143.92,<br>146.91                                 |
| Unit Cell Angles (α, β, γ) (°)        | 90, 90, 120                 | 90, 90, 90                                               |
| I/σ (last shell)                      | 16.8 (2.5)                  | 23.1 (3.1)                                               |
| R <sub>sym</sub> (last shell) (%)     | 11.4 (77.4)                 | 7.6 (45.3)                                               |
| Completeness (last shell) (%)         | 99.6 (99.3)                 | 98.9 (91.4)                                              |
| Number of Reflections                 | 146894                      | 134470                                                   |
| unique                                | 19606                       | 19061                                                    |
| Number of Se Sites                    | 9                           | -                                                        |
| Mean Figure of Merit                  | .394                        | -                                                        |
| Refinement                            |                             |                                                          |
| Resolution (Å)                        | 38 – 2.5                    | 36 – 2.3                                                 |
| Number of Reflections                 | 11048                       | 18652                                                    |
| working                               | 9944                        | 16786                                                    |
| free                                  | 1104                        | 1866                                                     |
| R <sub>work</sub> (last shell) (%)    | 22.4 (26.9)                 | 18.3 (24.1)                                              |
| R <sub>free</sub> (last shell) (%)    | 25.6 (31.9)                 | 21.1 (27.5)                                              |
| Structure Statistics                  |                             |                                                          |
| Number of Atoms (protein)             | 1787                        | 2565                                                     |
| solvent                               | 32                          | 136                                                      |
| r.m.s.d. bond lengths                 | 0.004                       | 0.009                                                    |
| r.m.s.d. bond angles                  | .81                         | 1.18                                                     |

**Table S3. Yeast Strains Used in This Study, Related to Figure 3**

Strains built in the W303 a mating type background:

| Strain Number | Relevant Genotype                                        | Reference |
|---------------|----------------------------------------------------------|-----------|
| YNJN1         | MATa, ade2-1, leu2-3, ura3, trp1-1, his3-11,15, can1-100 | -         |
| SMH25         | iml3Δ:: KanMX6                                           | This work |
| SMH26         | chl4Δ:: KanMX6                                           | This work |
| SMH27         | IML3(L173R)::KanMX6                                      | This work |
| SMH28         | IML3(G197R)::KanMX6                                      | This work |
| SMH84         | IML3(M198G)::KanMX6                                      | This work |
| SMH128        | CHL4(L416R)::KanMX6                                      | This work |
| SMH129        | CHL4(I422R)::KanMX6                                      | This work |
| SMH30         | CHL4(P428R)::KanMX6                                      | This work |
| SMH130        | CHL4(W430R)::KanMX6                                      | This work |
| SMH132        | CHL4(L416R;P428R)::KanMX6                                | This work |

Diploid strains built in the W303 background

| Strain Number | Relevant Genotype (MATa/MATα)                                                              | Reference |
|---------------|--------------------------------------------------------------------------------------------|-----------|
| SMH140        | IML3 / iml3Δ:: TRP1, pHis3-GFP-LacI::URA3 / ura3-1, leu2-3, 112 / lacO-256::LEU2           | -         |
| SMH141        | iml3Δ:: KanMX6 / iml3Δ:: TRP1, pHis3-GFP-LacI::URA3 / ura3-1, leu2-3, 112 / lacO-256::LEU2 | This work |
| SMH142        | IML3(G197R) / iml3Δ:: TRP1, pHis3-GFP-LacI::URA3 / ura3-1, leu2-3, 112 / lacO-256::LEU2    | This work |
