# Supplementary material
Source: PubMed Central journal article supplement (PMC3888643)

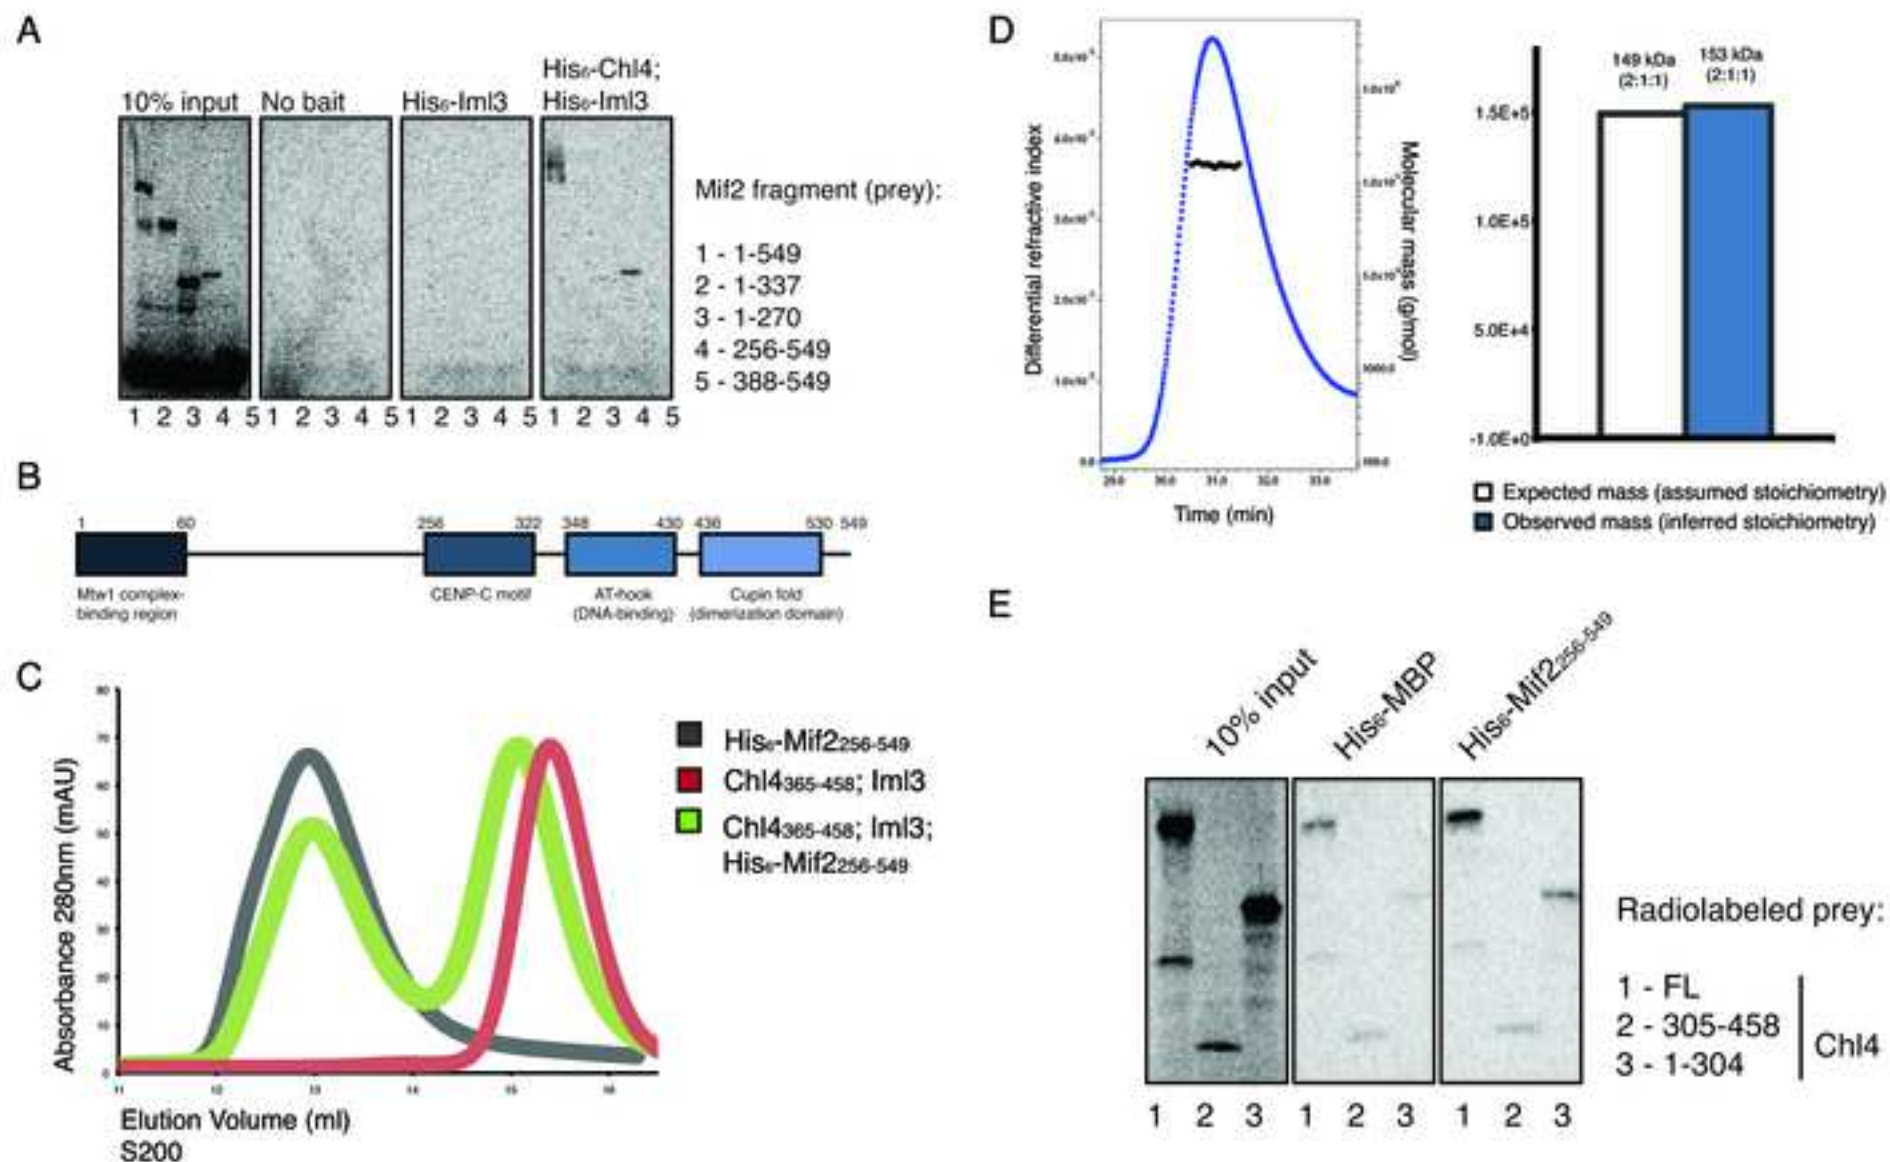

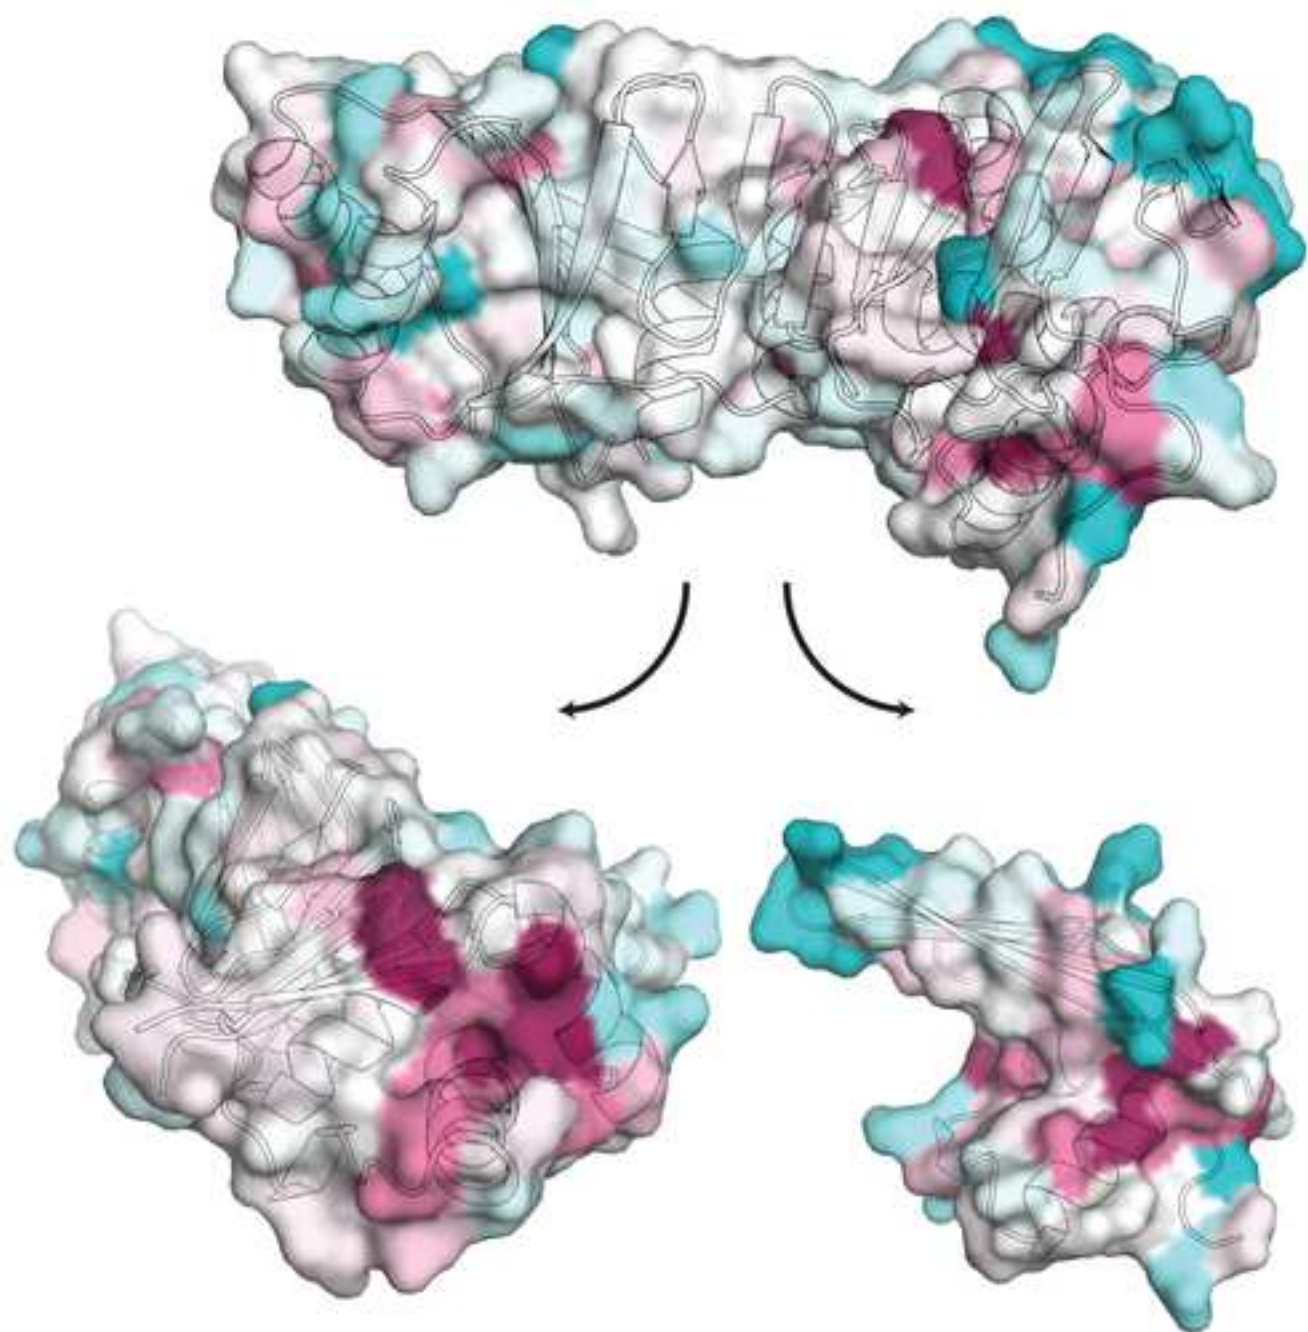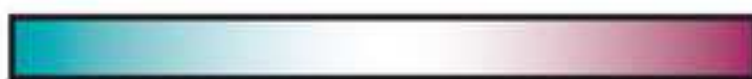

increasing conservation score

Supplement: NIHMS536213-supplement-02.pdf [file NIHMS536213-supplement-02.pdf]
